# Supplementary material for: Shadow ribbon: a detailed study of complex chemical plants with a simple integrated approach
Source: Royal Society of Chemistry journal article supplement (doi:10.1039/c4ra05234j), 2014-01-01
Supplement: c4ra05234j1.pdf [file c4ra05234j1.pdf]

## Shadow ribbon: a detailed study of complex chemical plants with a simple integrated approach

R. Monitto, N. Tuccitto

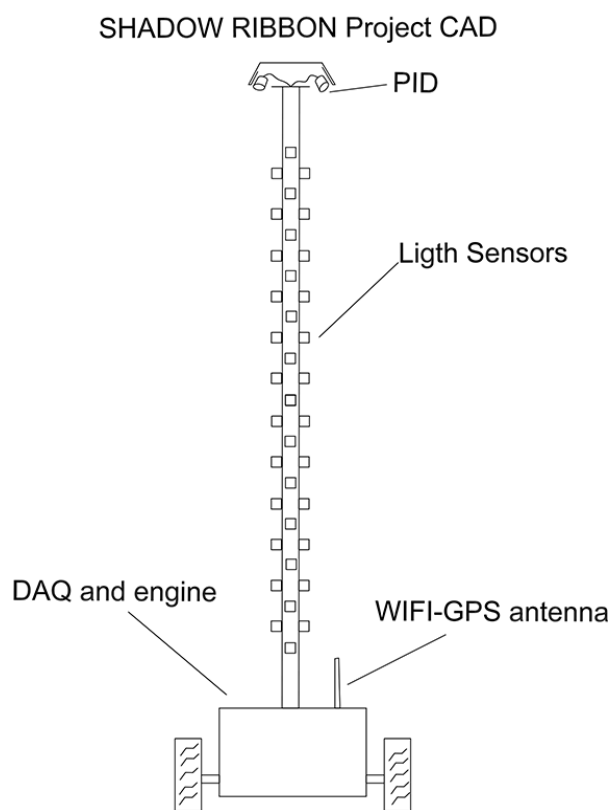

Fig.1 CAD sketch of Shadow Ribbon project

---
